# Supplementary material for: LncRNA LUCAT1 as a novel prognostic biomarker for patients with papillary thyroid cancer
Source: PubMed Central journal article supplement (PMC6779763; doi:10.1038/s41598-019-50913-7), 2019-10-07

Supplementary Information

**LncRNA LUCAT1 as a novel prognostic biomarker for patients with papillary thyroid cancer.**

Luzón Toro B, Fernández RM, Martos-Martínez JM, Rubio-Manzanares-Dorado M, Antiñolo G, Borrego S.

Supplementary Figure 1: All unprocessed original scans for all of the blots presented in figure 5.

**Pro-Caspase 8  
(18/43/7Kda)**

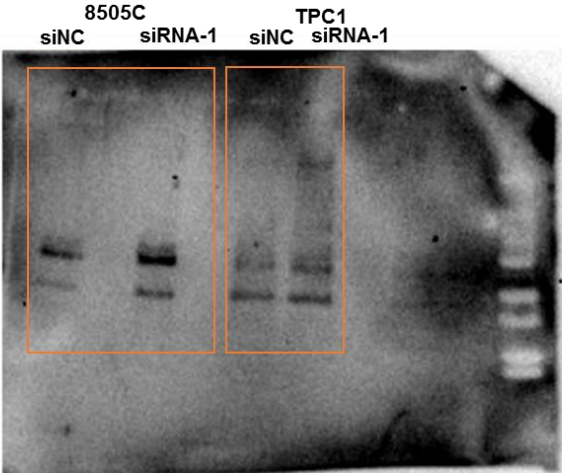

**Caspase 8 (57 KDa)  
Cleaved Caspase 8  
(43/18KDa)**

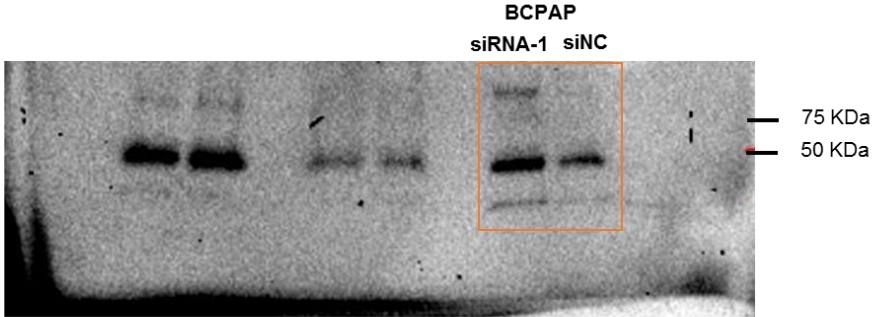

**Lamin A/C (A:74 Kda; C:63 Kda)**

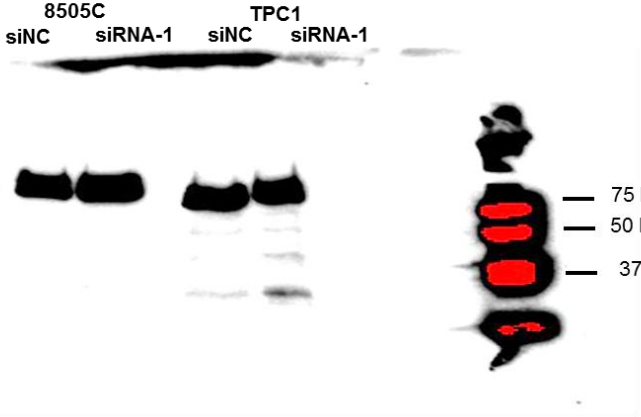

**Lamin A/C  
(74/63 Kda)  
Cleaved  
Lamin A/C  
(41/28 Kda)**

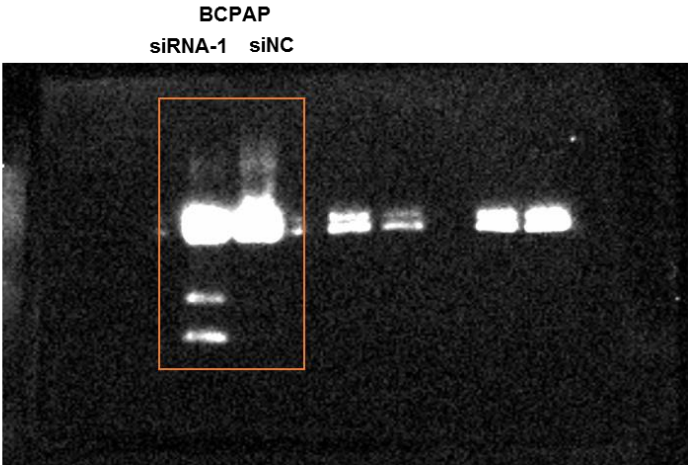

**PARP (116/89 Kda)**

**PARP  
(116 Kda)**

100 KDa —

75 KDa —

TPC1  
siRNA-1 siNC

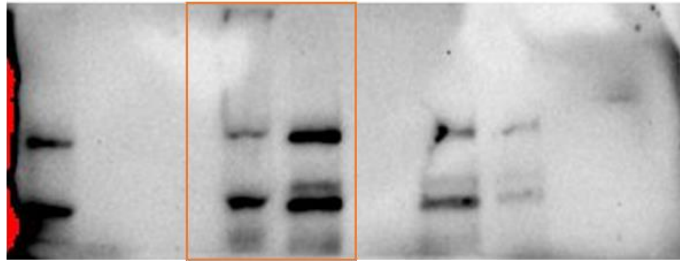

8505C  
siRNA siNC

BCPAP  
siNC siRNA

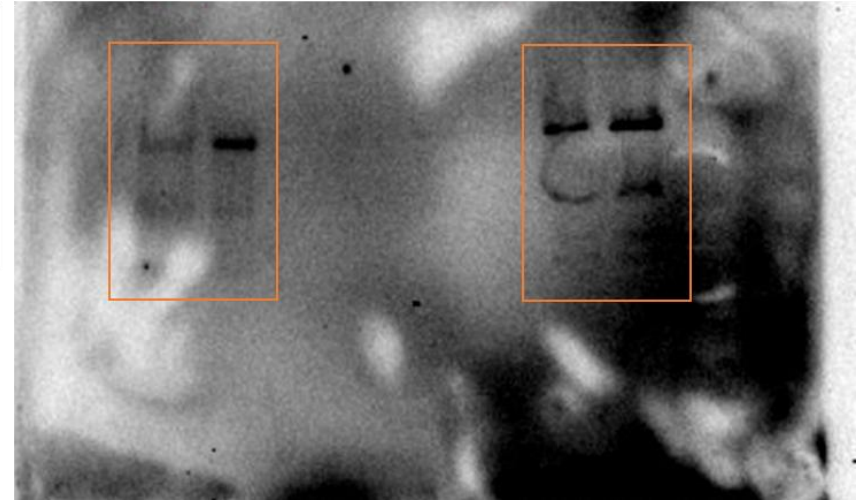

Supplementary Figure 2: All unprocessed original scans for all of the blots presented in figure 6.

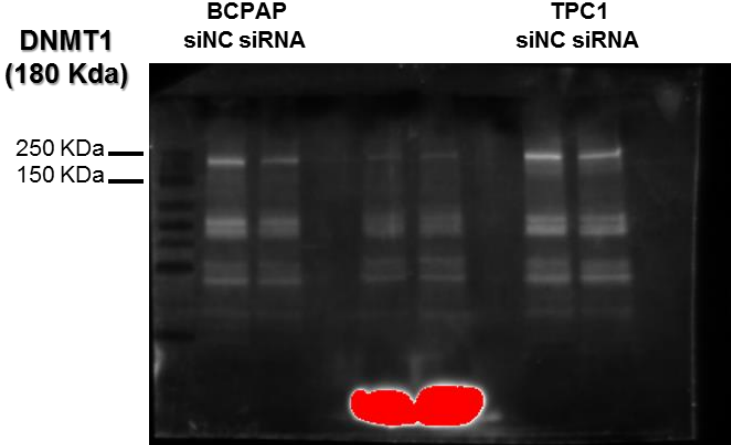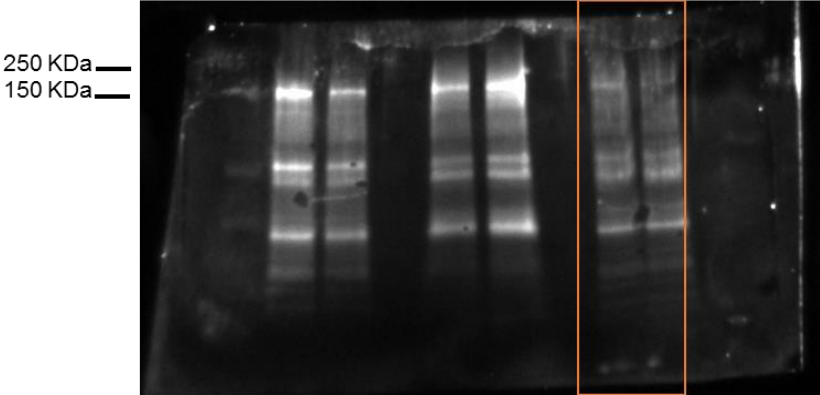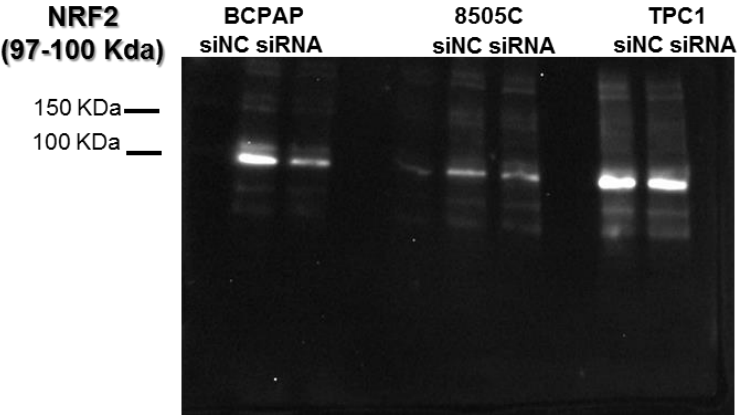

**EZH2  
(98 Kda)**

150 KDa  
100 KDa  
75 KDa

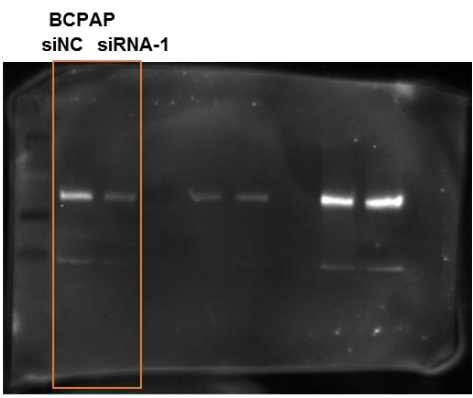

**TPC1  
siRNA-1 siNC**

150 KDa  
100 KDa  
75 KDa

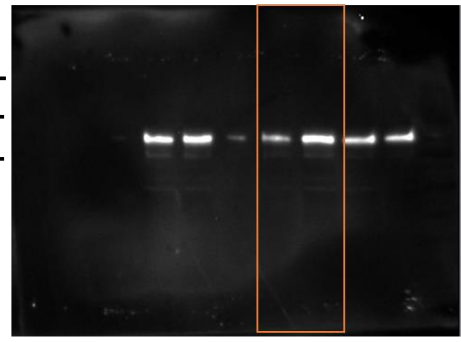

**8505C  
siRNA-1 siNC**

150 KDa  
100 KDa  
75 KDa

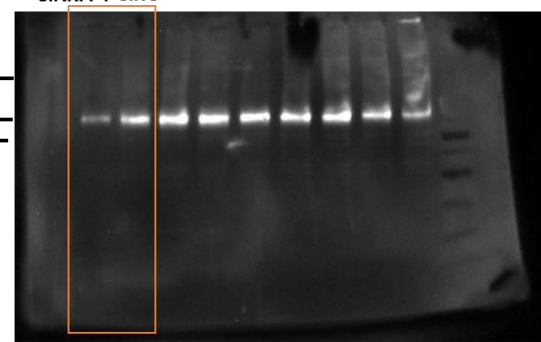

**HDAC1  
(62 Kda)**

75 KDa  
50 KDa

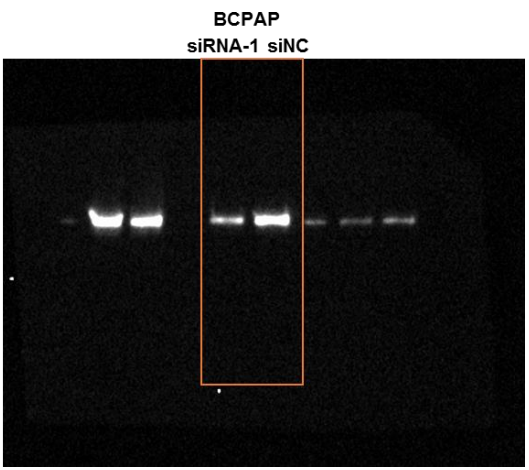

**TPC1  
siNC siRNA-1**

75 KDa  
50 KDa

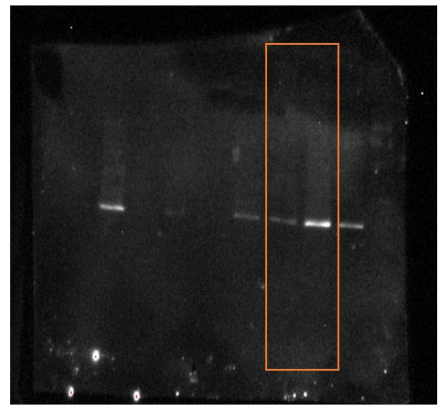

**8505C  
siRNA-1 siNC**

75 KDa  
50 KDa

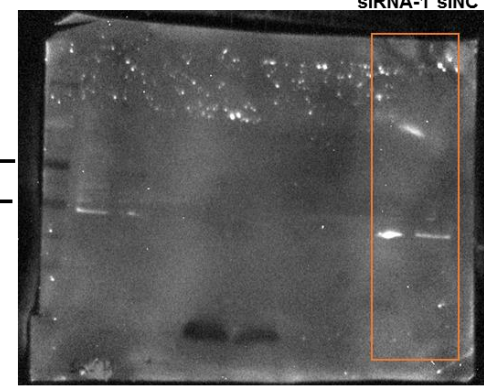

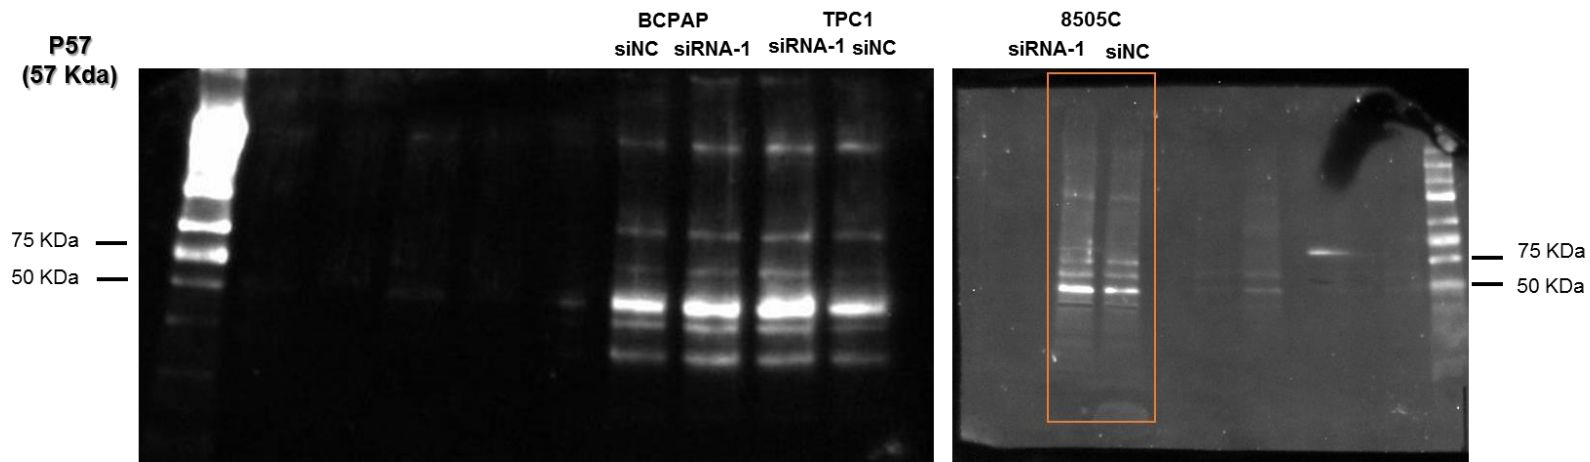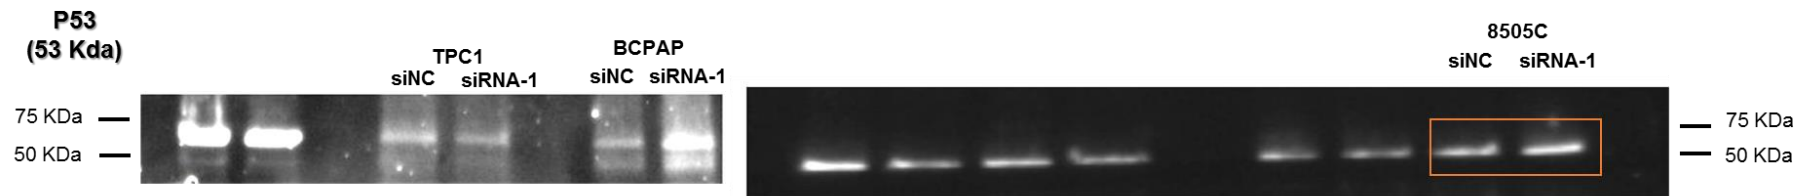

**CDK1  
(34 Kda)**

**BCPAP**  
siRNA-1 siNC

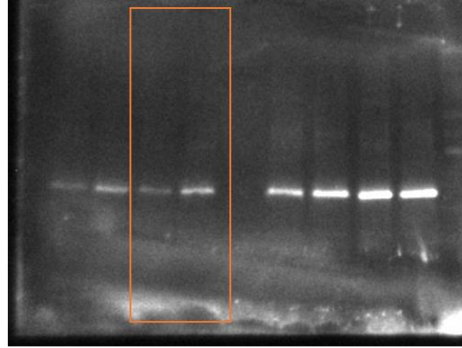

**TPC1**  
siNC siRNA-1

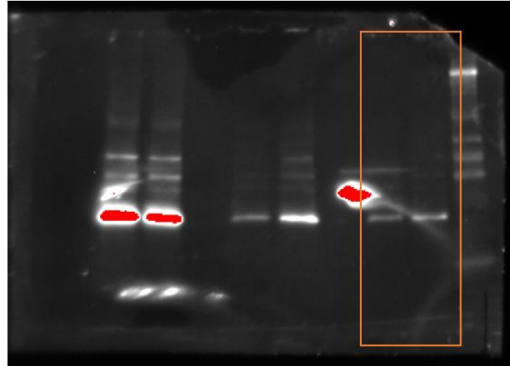

**8505C**  
siRNA-1 siNC

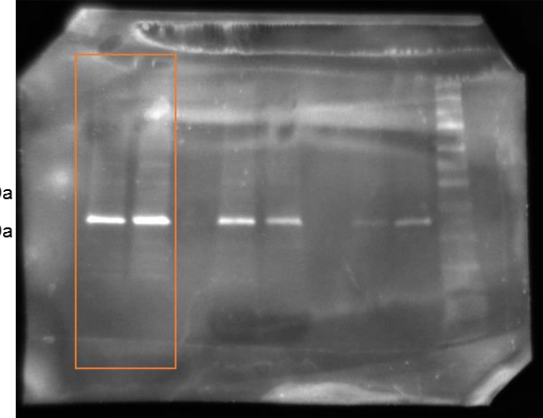

37 KDa —  
25 KDa —

37 KDa —  
25 KDa —

37 KDa —  
25 KDa —

**P21  
(21 Kda)**

**8505C**  
siNC siRNA-1

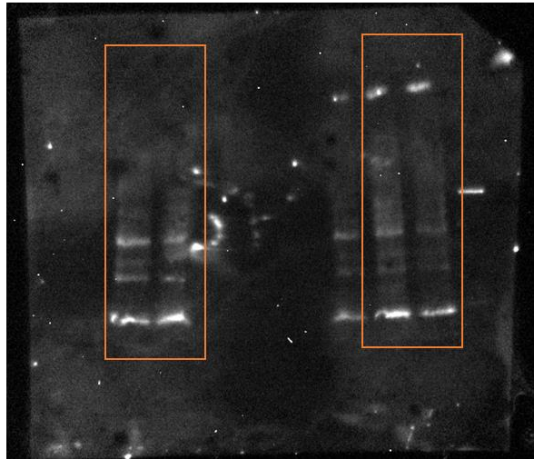

**BCPAP**  
siRNA-1 siNC

25 KDa —  
20 KDa —

**TPC1**  
siNC siRNA-1

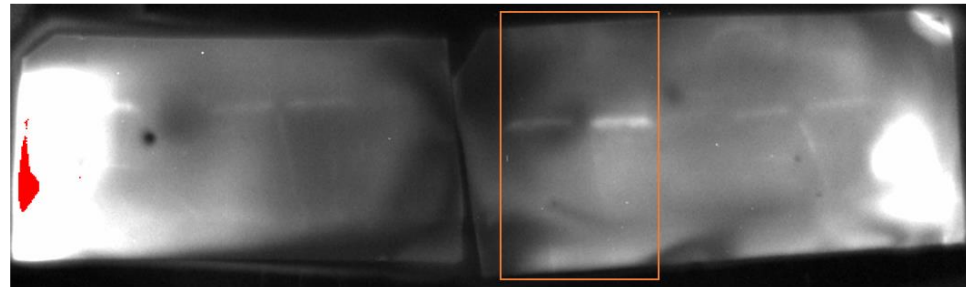

25 KDa —  
20 KDa —



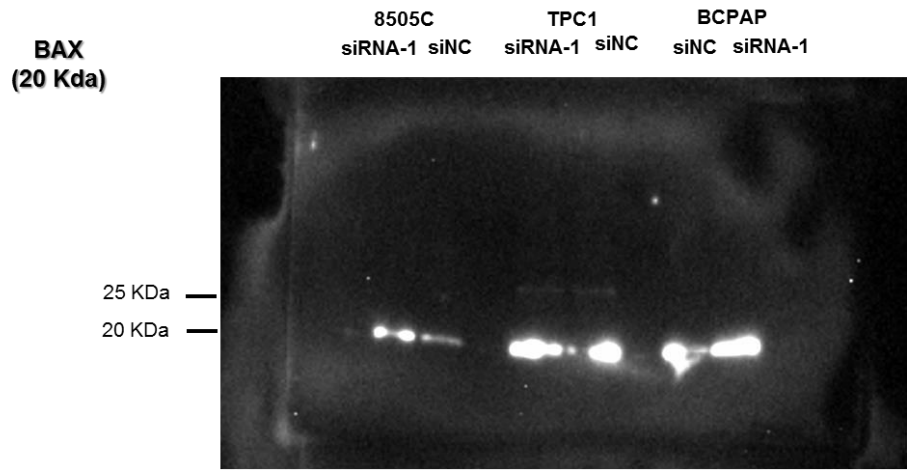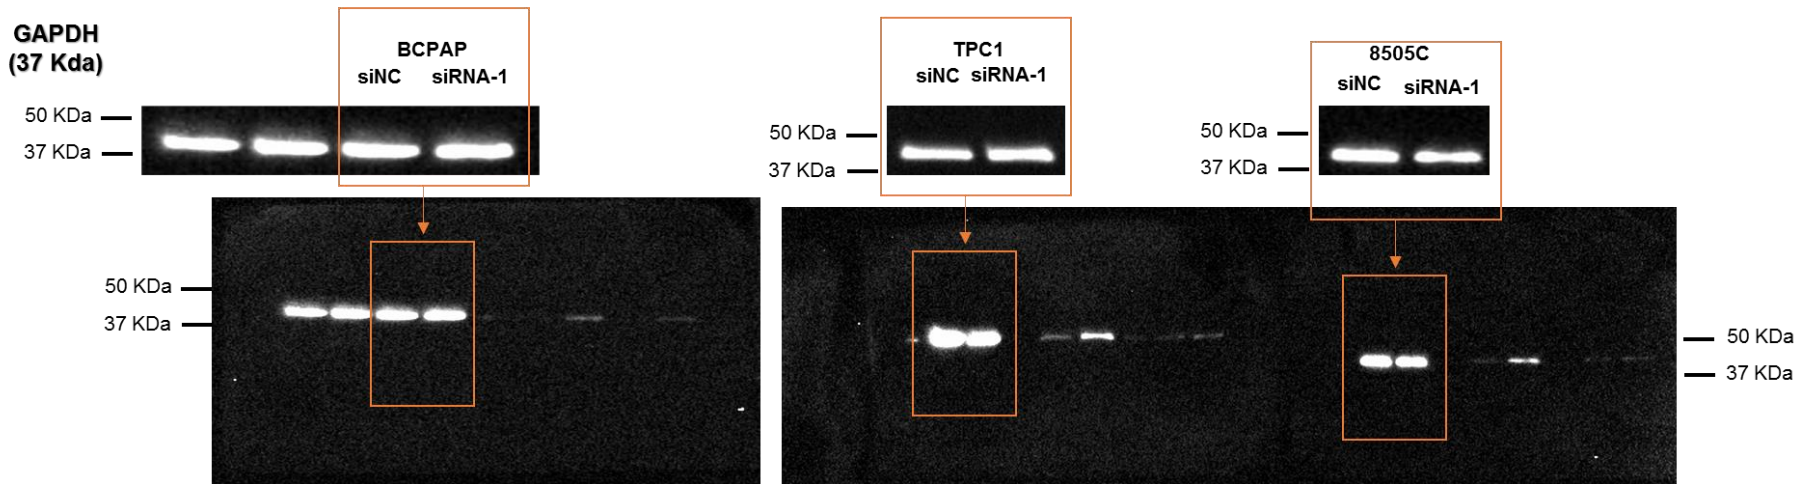

Supplement: 41598_2019_50913_MOESM1_ESM.pdf [file 41598_2019_50913_MOESM1_ESM.pdf]
