# Supplementary material for: LncRNA LUCAT1 as a novel prognostic biomarker for patients with papillary thyroid cancer
Source: PubMed Central journal article supplement (PMC6779763; doi:10.1038/s41598-019-50913-7), 2019-10-07
Supplement: 41598_2019_50913_MOESM2_ESM.pdf [file 41598_2019_50913_MOESM2_ESM.pdf]

**LncRNA *LUCAT1* as a novel prognostic biomarker for patients with papillary thyroid cancer.**

LncRNA *LUCAT1* as a novel prognostic biomarker for patients with papillary thyroid cancer.

Luzón Toro B<sup>1,2</sup>, Fernández RM<sup>1,2</sup>, Martos-Martínez JM<sup>3</sup>, Rubio-Manzanares-Dorado M<sup>3</sup>, Antiñolo G<sup>1,2</sup>, Borrego S<sup>1,2</sup>.

<sup>1</sup>Department of Maternofetal Medicine, Genetics and Reproduction, Institute of Biomedicine of Seville (IBIS), University Hospital Virgen del Rocío/CSIC/University of Seville, Seville, Spain.

<sup>2</sup>Centre for Biomedical Network Research on Rare Diseases (CIBERER) Seville, Spain.

<sup>3</sup>Endocrine Surgery Unit. General Surgery Department, University Hospital Virgen del Rocío, Seville, Spain.

Corresponding author: Salud Borrego, PhD, MD, Department of Maternofetal Medicine, Genetics and Reproduction, IBIS, University Hospital Virgen del Rocío/CSIC/University of Seville. Av. Manuel Siurot s/n, 41013, Seville, Spain. Phone: +34-955312641. Centre for Biomedical Network Research on Rare Diseases (CIBERER), Seville, 41013, Spain. salud.borrego.sspa@juntadeandalucia.es.

**Supplementary Table 1: All 84 lncRNAs contained on arrays.**

| Position | UniGene   | GenBank         | Symbol      | Description                                                               |
|----------|-----------|-----------------|-------------|---------------------------------------------------------------------------|
| A01      | N/A       | ENST00000437930 | ACTA2-AS1   | ACTA2 antisense RNA1                                                      |
| A02      | N/A       | ENST00000460833 | ADAMTS9-AS2 | ADAMTS9 antisense RNA 2                                                   |
| A03      | N/A       | ENST00000608442 | AFAP1-AS1   | AFAP1 antisense RNA 1                                                     |
| A04      | N/A       | ENST00000601203 | AIRN        | Antisense of IGF2R non-protein coding RNA                                 |
| A05      | N/A       | NR_047671       | BANCR       | BRAF-activated non-protein coding RNA                                     |
| A06      | Hs.24611  | NR_024049       | BCAR4       | Breast cancer anti-estrogen resistance 4                                  |
| A07      | N/A       | NR_103783       | BLACAT1     | Bladder cancer associated transcript 1 (non-protein coding)               |
| A08      | N/A       | ENST00000604200 | CAHM        | Colon adenocarcinoma hypermethylated (non-protein coding)                 |
| A09      | N/A       | ENST00000413862 | CBR3-AS1    | CBR3 antisense RNA 1                                                      |
| A10      | N/A       | ENST00000500112 | CCAT1       | Colon cancer associated transcript 1 (non-protein coding)                 |
| A11      | N/A       | NR_109834       | CCAT2       | Colon cancer associated transcript 2 (non-protein coding)                 |
| A12      | N/A       | ENST00000421632 | CDKN2B-AS1  | CDKN2B antisense RNA 1                                                    |
| B01      | N/A       | ENST00000501177 | CRNDE       | Colorectal neoplasia differentially expressed (non-protein coding)        |
| B02      | N/A       | NR_002733       | DGCR5       | DiGeorge syndrome critical region gene 5 (non-protein coding)             |
| B03      | Hs.547964 | NR_002612       | DLEU2       | Deleted in lymphocytic leukemia 2 (non-protein coding)                    |
| B04      | Hs.34969  | NR_015448       | DLX6-AS1    | DLX6 antisense RNA 1                                                      |
| B05      | Hs.312592 | NR_002791       | EMX2OS      | EMX2 opposite strand (non-protein coding)                                 |
| B06      | N/A       | ENST00000418855 | FTX         | FTX transcript, XIST regulator (non-protein coding)                       |
| B07      | N/A       | ENST00000419650 | GACAT1      | Gastric cancer associated transcript 1 (non-protein coding)               |
| B08      | Hs.736055 | NR_002578       | GAS5        | Growth arrest-specific 5 (non-protein coding)                             |
| B09      | N/A       | NR_044995       | GAS6-AS1    | GAS6 antisense RNA 1                                                      |
| B10      | Hs.122718 | NR_002785       | GNAS-AS1    | GNAS antisense RNA 1                                                      |
| B11      | Hs.533566 | NR_002196       | H19         | H19, imprinted maternally expressed transcript (non-protein coding)       |
| B12      | Hs.61435  | NR_003679       | HAND2-AS1   | Nbla00301                                                                 |
| C01      | N/A       | NR_045680       | HEIH        | Hepatocellular carcinoma up-regulated EZH2-associated long non-coding RNA |
| C02      | N/A       | ENST00000557544 | HIF1A-AS1   | HIF1A antisense RNA 1 [Source:HGNC Symbol;Acc:43014]                      |

|     |           |                 |            |                                                                              |
|-----|-----------|-----------------|------------|------------------------------------------------------------------------------|
| C03 | N/A       | NR_045406       | HIF1A-AS2  | HIF1A antisense RNA 2                                                        |
| C04 | Hs.612351 | ENST0000043333  | HNF1A-AS1  | HNF1A antisense RNA 1 (non-protein coding)                                   |
| C05 | Hs.197076 | NR_003716       | HOTAIR     | Hox transcript antisense RNA (non-protein coding)                            |
| C06 | N/A       | ENST00000425358 | HOTAIRM1   | HOXA transcript antisense RNA, myeloid-specific 1                            |
| C07 | N/A       | ENST00000421733 | HOTTIP     | HOXA distal transcript antisense RNA                                         |
| C08 | Hs.587427 | NR_002795       | HOXA11-AS  | HOXA11 antisense RNA 1 (non-protein coding)                                  |
| C09 | N/A       | ENST00000517550 | HOXA-AS2   | HOXA cluster antisense RNA 2                                                 |
| C10 | N/A       | ENST00000503668 | HULC       | Hepatocellular carcinoma up-regulated long non-coding RNA                    |
| C11 | N/A       | NR_023915       | IPW        | Imprinted in Prader-Willi syndrome (non-protein coding)                      |
| C12 | N/A       | KC469579        | JADRR      | JADE1 adjacent regulatory RNA                                                |
| D01 | Hs.741312 | NR_002728       | KCNQ1OT1   | KCNQ1 overlapping transcript 1 (non-protein coding)                          |
| D02 | N/A       | ENST00000407852 | KRAS1      | Kirsten rat sarcoma viral oncogene homolog pseudogene 1                      |
| D03 | Hs.652166 | NR_024204       | LINC00152  | Non-protein coding RNA 152                                                   |
| D04 | N/A       | NR_001558       | LINC00261  | Long intergenic non-protein coding RNA 261                                   |
| D05 | Hs.433151 | NR_024065       | LINC00312  | Non-protein coding RNA 312                                                   |
| D06 | N/A       | NR_046189       | LINC00538  | Long intergenic non-protein coding RNA 538                                   |
| D07 | Hs.606465 | NR_024480       | LINC00887  | Hypothetical LOC100131551                                                    |
| D08 | N/A       | ENST00000412141 | LINC00963  | Long intergenic non-protein coding RNA 963                                   |
| D09 | N/A       | ENST00000594200 | LINC01233  | Long intergenic non-protein coding RNA 1233                                  |
| D10 | N/A       | ENST00000510694 | LINC01234  | Long intergenic non-protein coding RNA 1234                                  |
| D11 | N/A       | GU228577        | LSINCT5    | Long stress-induced non-coding transcript 5                                  |
| D12 | N/A       | ENST00000511918 | LUCAT1     | Lung cancer associated transcript 1 (non-protein coding)                     |
| E01 | Hs.642877 | NR_002819       | MALAT1     | Metastasis associated lung adenocarcinoma transcript 1 (non-protein coding)  |
| E02 | Hs.654863 | NR_002766       | MEG3       | Maternally expressed 3 (non-protein coding)                                  |
| E03 | Hs.697120 | NR_001458       | MIR155HG   | MIR155 host gene (non-protein coding)                                        |
| E04 | Hs.652877 | NR_027349       | MIR17HG    | MiR-17-92 cluster host gene (non-protein coding)                             |
| E05 | N/A       | ENST00000304425 | MIR31HG    | MIR31 host gene (non-protein coding)                                         |
| E06 | Hs.326728 | NR_027148       | MIR7-3HG   | Non-protein coding RNA 306                                                   |
| E07 | N/A       | ENST0000041980  | MRPL23-AS1 | MRPL23 antisense RNA 1                                                       |
| E08 | N/A       | NR_102270       | NAMA       | Non-protein coding RNA, associated with MAP kinase pathway and growth arrest |
| E09 | Hs.559259 | NR_003108       | NBR2       | Neighbor of BRCA1 gene 2 (non-protein coding)                                |
| E10 | N/A       | NR_028272       | NEAT1      | Nuclear paraspeckle assembly transcript 1 (non-protein coding)               |

|     |           |                 |             |                                                                             |
|-----|-----------|-----------------|-------------|-----------------------------------------------------------------------------|
| E11 | N/A       | ENST00000517270 | NRON        | Non-protein coding RNA, repressor of NFAT                                   |
| E12 | N/A       | NR_109836       | PANDAR      | Promoter of CDKN1A antisense DNA damage activated RNA                       |
| F01 | Hs.663766 | NR_015342       | PCA3        |                                                                             |
| F02 | N/A       | ENST00000519319 | PCAT1       | Prostate cancer associated transcript 1 (non-protein coding)                |
| F03 | Hs.546994 | NR_002769       | PCGEM1      | Prostate-specific transcript 1 (non-protein coding)                         |
| F04 | N/A       | ENST0000044559  | POU5F1P5    | POU class 5 homeobox 1 pseudogene 5                                         |
| F05 | N/A       | ENST00000519282 | PRNCR1      | Prostate cancer associated non-coding RNA 1                                 |
| F06 | N/A       | AK023948        | PTCSC1      | Papillary thyroid carcinoma susceptibility candidate 1 (non-protein coding) |
| F07 | N/A       | ENST0000055613  | PTCSC3      | Papillary thyroid carcinoma susceptibility candidate 3 (non-protein coding) |
| F08 | Hs.493716 | NR_023917       | PTENP1      | Phosphatase and tensin homolog pseudogene 1                                 |
| F09 | Hs.675281 | NR_003367       | PVT1        | Pvt1 oncogene (non-protein coding)                                          |
| F10 | N/A       | ENST0000036346  | RMRP        | RNA component of mitochondrial RNA processing endoribonuclease              |
| F11 | N/A       | NR_024037       | RMST        | Rhabdomyosarcoma 2 associated transcript (non-protein coding)               |
| F12 | N/A       | ENST00000455390 | RPS6KA2-AS1 | RPS6KA2 antisense RNA 1                                                     |
| G01 | N/A       | NR_038108       | SNHG16      | Small nucleolar RNA host gene 16 (non-protein coding)                       |
| G02 | N/A       | AK024556        | SPRY4-IT1   | SPRY4 intronic transcript 1 (non-protein coding)                            |
| G03 | N/A       | NR_002190       | SUMO1P3     | SUMO1 pseudogene 3                                                          |
| G04 | N/A       | ENST00000363312 | TERC        | Telomerase RNA component                                                    |
| G05 | N/A       | ENST00000431460 | TRERNA1     | Translation regulatory long non-coding RNA 1                                |
| G06 | Hs.529901 | NR_003255       | TSIX        | TSIX transcript, XIST antisense RNA (non-protein coding)                    |
| G07 | Hs.554829 | NR_002323       | TUG1        | Taurine upregulated 1 (non-protein coding)                                  |
| G08 | N/A       | ENST00000466156 | TUSC7       | Tumor suppressor candidate 7 (non-protein coding)                           |
| G09 | Hs.644234 | NR_015379       | UCA1        | Urothelial cancer associated 1 (non-protein coding)                         |
| G10 | Hs.567499 | NR_023920       | WT1-AS      | WT1 antisense RNA (non-protein coding)                                      |
| G11 | Hs.529901 | NR_001564       | XIST        | X (inactive)-specific transcript (non-protein coding)                       |
| G12 | Hs.356766 | NR_003604       | ZFAS1       | ZNF1 antisense RNA 1                                                        |
| H01 | Hs.520640 | NM_001101       | ACTB        | Actin, beta                                                                 |
| H02 | Hs.534255 | NM_004048       | B2M         | Beta-2-microglobulin                                                        |
| H03 | Hs.546285 | NM_001002       | RPLP0       | Ribosomal protein, large, P0                                                |
| H04 | N/A       | NR_001445       | RN7SK       | RNA, 7SK small nuclear                                                      |
| H05 | N/A       | NR_002907       | SNORA73A    | Small nucleolar RNA, H/ACA box 73A                                          |
| H06 | N/A       | SA_00105        | HGDC        | Human Genomic DNA Contamination                                             |

|     |     |          |     |                               |
|-----|-----|----------|-----|-------------------------------|
| H07 | N/A | SA_00104 | RTC | Reverse Transcription Control |
| H08 | N/A | SA_00104 | RTC | Reverse Transcription Control |
| H09 | N/A | SA_00104 | RTC | Reverse Transcription Control |
| H10 | N/A | SA_00103 | PPC | Positive PCR Control          |
| H11 | N/A | SA_00103 | PPC | Positive PCR Control          |
| H12 | N/A | SA_00103 | PPC | Positive PCR Control          |
