# Supplementary material for: LncRNA LUCAT1 as a novel prognostic biomarker for patients with papillary thyroid cancer
Source: PubMed Central journal article supplement (PMC6779763; doi:10.1038/s41598-019-50913-7), 2019-10-07
Supplement: 41598_2019_50913_MOESM3_ESM.pdf [file 41598_2019_50913_MOESM3_ESM.pdf]

**LncRNA *LUCAT1* as a novel prognostic biomarker for patients with papillary thyroid cancer.**

LncRNA *LUCAT1* as a novel prognostic biomarker for patients with papillary thyroid cancer.

Luzón Toro B<sup>1,2</sup>, Fernández RM<sup>1,2</sup>, Martos-Martínez JM<sup>3</sup>, Rubio-Manzanares-Dorado M<sup>3</sup>, Antiñolo G<sup>1,2</sup>, Borrego S<sup>1,2</sup>.

<sup>1</sup>Department of Maternofetal Medicine, Genetics and Reproduction, Institute of Biomedicine of Seville (IBIS), University Hospital Virgen del Rocío/CSIC/University of Seville, Seville, Spain.

<sup>2</sup>Centre for Biomedical Network Research on Rare Diseases (CIBERER) Seville, Spain.

<sup>3</sup>Endocrine Surgery Unit. General Surgery Department, University Hospital Virgen del Rocío, Seville, Spain.

Corresponding author: Salud Borrego, PhD, MD, Department of Maternofetal Medicine, Genetics and Reproduction, IBIS, University Hospital Virgen del Rocío/CSIC/University of Seville. Av. Manuel Siurot s/n, 41013, Seville, Spain. Phone: +34-955312641. Centre for Biomedical Network Research on Rare Diseases (CIBERER), Seville, 41013, Spain. salud.borrego.sspa@juntadeandalucia.es.

**Supplementary Table 2: Knockdown of human *LUCAT1*:** Silencing assays performed on all cell lines transfected at 24, 48 and 72 h with siRNA 1 and siRNA 2 at 5 and 20  $\mu$ m. *LUCAT1* expression levels were determined by qRT-PCR, using GAPDH as internal control. All reactions were performed in triplicate.

| <b>BCPAP_24h</b>                  |           |                |                                    |                                         |                           |                  |                       |
|-----------------------------------|-----------|----------------|------------------------------------|-----------------------------------------|---------------------------|------------------|-----------------------|
| <b>GAPDH</b>                      | <b>Ct</b> | <b>AVERAGE</b> | <b><math>\Delta\Delta</math>Ct</b> | <b>2exp-<math>\Delta\Delta</math>Ct</b> | <b>Silencing rate (%)</b> | <b>t student</b> | <b>Standard Error</b> |
| si-NC                             | 16,2678   | 16,432375      | 0                                  | 1                                       |                           |                  |                       |
| siRNA1_5 $\mu$ M                  | 15,2809   | 15,71485       | 0                                  | 1                                       |                           |                  |                       |
| siRNA1_20 $\mu$ M                 | 15,762    | 15,80115       | 0                                  | 1                                       |                           |                  |                       |
| siRNA2_5 $\mu$ M                  | 16,02     | 15,875         | 0                                  | 1                                       |                           |                  |                       |
| siRNA2_20 $\mu$ M                 | 16,47     | 16,41          | 0                                  | 1                                       |                           |                  |                       |
| <b><i>LUCAT1</i></b>              |           |                |                                    |                                         |                           |                  |                       |
| si-NC                             | 25,9255   | 25,517025      | 0                                  | 1                                       |                           |                  | 0                     |
| siRNA1_5 $\mu$ M                  | 26,7512   | 26,631175      | 1,831675                           | 0,280938256                             | 71,91                     | 0,021            | 0,140                 |
| <b>siRNA1_20<math>\mu</math>M</b> | 28,8136   | 27,74805       | 2,86225                            | 0,137523493                             | <b>86,25</b>              | 0,002            | 0,270                 |
| siRNA2_5 $\mu$ M                  | 27,77     | 27,82          | 0,33                               | 0,79                                    | 21,00                     |                  | 0,049                 |
| siRNA2_20 $\mu$ M                 | 27,19     | 26,7           | -0,25                              | 1,19                                    | -19,00                    |                  | 0,150                 |
| <b>TPC1_24h</b>                   |           |                |                                    |                                         |                           |                  |                       |
| <b>GAPDH</b>                      | <b>Ct</b> | <b>AVERAGE</b> | <b><math>\Delta\Delta</math>Ct</b> | <b>2exp-<math>\Delta\Delta</math>Ct</b> | <b>Silencing rate (%)</b> | <b>t student</b> | <b>Standard Error</b> |
| si-NC                             | 18,354    | 18,35          | 0                                  | 1                                       |                           |                  |                       |
| siRNA1_5 $\mu$ M                  | 16,204    | 17,50          | 0                                  | 1                                       |                           |                  |                       |
| siRNA1_20 $\mu$ M                 | 16,167    | 16,26          | 0                                  | 1                                       |                           |                  |                       |
| siRNA2_5 $\mu$ M                  | 16,234    | 16,69          | 0                                  | 1                                       |                           |                  |                       |
| siRNA2_20 $\mu$ M                 | 17,499    | 17,38          | 0                                  | 1                                       |                           |                  |                       |
| <b><i>LUCAT1</i></b>              |           |                |                                    |                                         |                           |                  |                       |
| si-NC                             | 29,097    | 29,0935        | 0                                  | 1                                       |                           |                  | 0                     |
| siRNA1_5 $\mu$ M                  | 28,282    | 29,74725       | 1,54945                            | 0,341640283                             | 65,84                     | 0,019            | 0,281                 |
| <b>siRNA1_20<math>\mu</math>M</b> | 28,714    | 28,61825       | 1,6667                             | 0,314972985                             | <b>68,50</b>              | 0,053            | 0,050                 |

|                      |           |                |             |                  |                           |                  |                       |
|----------------------|-----------|----------------|-------------|------------------|---------------------------|------------------|-----------------------|
| siRNA2_5μM           | 28,097    | 28,67525       | 1,2927      | 0,408186394      | 59,18                     | 0,069            | 0,090                 |
| siRNA2_20μM          | 29,613    | 28,27875       | 0,20745     | 0,866066674      | 13,39                     | 0,224            | 0,215                 |
| <b>8505c_24h</b>     |           |                |             |                  |                           |                  |                       |
| <b><i>GAPDH</i></b>  | <b>Ct</b> | <b>AVERAGE</b> | <b>ΔΔCt</b> | <b>2exp-ΔΔCt</b> | <b>Silencing rate (%)</b> | <b>t student</b> | <b>Standard Error</b> |
| si-NC                | 14,739    | 14,876         | 0           | 1                |                           |                  |                       |
| siRNA1_5μM           | 14,645    | 14,505         | 0           | 1                |                           |                  |                       |
| siRNA1_20μM          | 15,333    | 15,4635        | 0           | 1                |                           |                  |                       |
| siRNA2_5μM           | 15,171    | 15,3535        | 0           | 1                |                           |                  |                       |
| siRNA2_20μM          | 15,117    | 14,811         | 0           | 1                |                           |                  |                       |
| <b><i>LUCAT1</i></b> |           |                |             |                  |                           |                  |                       |
| si-NC                | 26,137    | 25,4605        | 0           | 1                |                           |                  | 0                     |
| siRNA1_5μM           | 28,767    | 28,2935        | 2,2455      | 0,210880851      | 85,97                     | 0,048            | 0,25814349            |
| <b>siRNA1_20μM</b>   | 28,295    | 28,578         | 2,64        | 0,160428237      | <b>88,50</b>              | 0,025            | 0,28276974            |
| siRNA2_5μM           | 28,605    | 27,75325       | 2,35775     | 0,195095175      | 79,60                     | 0,022            | 0,23523688            |
| siRNA2_20μM          | 29,5      | 28,01225       | 2,7015      | 0,153733129      | 83,00                     | 0,042            | 0,26458592            |
